# Supplementary material for: Relationship between sex and cardiovascular mortality in chronic kidney disease: A systematic review and meta-analysis
Source: PubMed Central journal article supplement (PMC8274915; doi:10.1371/journal.pone.0254554), 2021-07-12
Supplement: pone.0254554.s003.pdf [file pone.0254554.s003.pdf]

**NEWCASTLE - OTTAWA QUALITY ASSESSMENT SCALE  
CASE CONTROL STUDIES**

Note: A study can be awarded a maximum of one star for each numbered item within the Selection and Exposure categories. A maximum of two stars can be given for Comparability.

**Selection**

- 1) Is the case definition adequate?
  - a) yes, with independent validation ✳
  - b) yes, eg record linkage or based on self reports
  - c) no description
- 2) Representativeness of the cases
  - a) consecutive or obviously representative series of cases ✳
  - b) potential for selection biases or not stated
- 3) Selection of Controls
  - a) community controls ✳
  - b) hospital controls
  - c) no description
- 4) Definition of Controls
  - a) no history of disease (endpoint) ✳
  - b) no description of source

**Comparability**

- 1) Comparability of cases and controls on the basis of the design or analysis
  - a) study controls for \_\_\_\_\_ (Select the most important factor.) ✳
  - b) study controls for any additional factor ✳ (This criteria could be modified to indicate specific control for a second important factor.)

**Exposure**

- 1) Ascertainment of exposure
  - a) secure record (eg surgical records) ✳
  - b) structured interview where blind to case/control status ✳
  - c) interview not blinded to case/control status
  - d) written self report or medical record only
  - e) no description
- 2) Same method of ascertainment for cases and controls
  - a) yes ✳
  - b) no
- 3) Non-Response rate
  - a) same rate for both groups ✳
  - b) non respondents described
  - c) rate different and no designation

## NEWCASTLE - OTTAWA QUALITY ASSESSMENT SCALE COHORT STUDIES

Note: A study can be awarded a maximum of one star for each numbered item within the Selection and Outcome categories. A maximum of two stars can be given for Comparability

### **Selection**

- 1) Representativeness of the exposed cohort
  - a) truly representative of the average \_\_\_\_\_ (describe) in the community ✱
  - b) somewhat representative of the average \_\_\_\_\_ in the community ✱
  - c) selected group of users eg nurses, volunteers
  - d) no description of the derivation of the cohort
- 2) Selection of the non exposed cohort
  - a) drawn from the same community as the exposed cohort ✱
  - b) drawn from a different source
  - c) no description of the derivation of the non exposed cohort
- 3) Ascertainment of exposure
  - a) secure record (eg surgical records) ✱
  - b) structured interview ✱
  - c) written self report
  - d) no description
- 4) Demonstration that outcome of interest was not present at start of study
  - a) yes ✱
  - b) no

### **Comparability**

- 1) Comparability of cohorts on the basis of the design or analysis
  - a) study controls for \_\_\_\_\_ (select the most important factor) ✱
  - b) study controls for any additional factor ✱ (This criteria could be modified to indicate specific control for a second important factor.)

### **Outcome**

- 1) Assessment of outcome
  - a) independent blind assessment ✱
  - b) record linkage ✱
  - c) self report
  - d) no description
- 2) Was follow-up long enough for outcomes to occur
  - a) yes (select an adequate follow up period for outcome of interest) ✱
  - b) no
- 3) Adequacy of follow up of cohorts
  - a) complete follow up - all subjects accounted for ✱
  - b) subjects lost to follow up unlikely to introduce bias - small number lost - > \_\_\_\_ % (select an adequate %) follow up, or description provided of those lost) ✱
  - c) follow up rate < \_\_\_\_% (select an adequate %) and no description of those lost
  - d) no statement
